# Supplementary material
Source: bioRxiv or medRxiv preprint supplement (https://www.biorxiv.org/highwire/filestream/54440/field_highwire_adjunct_files/0/135293-1.pdf)
Supplement: Supplementary file [file 135293-1.pdf]

# Integrated Bayesian analysis of rare exonic variants to identify risk genes for schizophrenia and neurodevelopmental disorders

August 21, 2017

## Contents

|                                                                                             |          |
|---------------------------------------------------------------------------------------------|----------|
| <b>1 Additional file 1 — Supplementary Information</b>                                      | <b>1</b> |
| 1.1 Supplementary Results . . . . .                                                         | 1        |
| 1.2 Supplementary methods . . . . .                                                         | 2        |
| 1.2.1 Analysis of SCZ data . . . . .                                                        | 2        |
| 1.2.2 extTADA pipeline: extended transmission (case-control) and de novo analysis . . . . . | 3        |
| 1.2.3 Infer parameters using MCMC results . . . . .                                         | 6        |
| 1.3 Supplementary Figures . . . . .                                                         | 7        |
| 1.4 Supplementary Tables . . . . .                                                          | 23       |

## 1 Additional file 1 — Supplementary Information

This file (AdditionalFile1.pdf) describes supplementary results, methods, data, figures and short Tables.

### 1.1 Supplementary Results

#### 1.1.0.1 Simulation case-control data only

To evaluate the performance of the approximate CC model for different parameter values, we simulated a single CC sample with either one or two variant/annotation classes. We tested sample sizes ranging from that of the available data, 1,092 each cases and controls (ASD), and 3,157 cases and controls (SCZ), to larger sample sizes of 10,000 cases and controls, and 20,000 cases and controls.

Overall, high correlations ( $\sim 1$ ) between estimated and simulated parameter values indicate little bias in inference based on CC data (Figure S4 and S6). Slight over estimation was observed for the sample size of 1092, especially for risk-gene proportions.

An additional analysis was carried out to assess the performance of specific simulated values. Correlations were calculated for each mean RR and  $\pi$  value. For one CC class, mean RRs were estimated well by the model with correlations  $\sim 1$  (Figure S5). However, the proportion of risk genes was affected by mean RRs. They were estimated well when mean RRs were between 1.5 and 3.5, but underestimated with smaller mean RRs and slightly overestimated with larger mean RRs (Figure S5). For two CC classes, high correlations ( $\geq 0.97$ ) between simulated and estimated values were seen for all parameters. In addition, small mean RRs of a given class did not directly affect the estimated values of proportions of risk genes (Figure S7).

The issue of poor estimation for one class, but good estimation for  $> 1$  class was expected. This was an advantage of using multiple classes compared to using only one class in the estimation process when the clustering signal was not very strong. Small mean RRs could result in difficulties in the calculation process to differentiate between a risk gene (mean RR  $> 1$ ) and a non-risk gene (mean RR  $\sim 1$ ). If one class was used then many risk genes would be considered to be non-risk genes. If more than one class was used, such risk genes would be assigned as genuine risk genes due to the information available from other classes.

## 1.2 Supplementary methods

### 1.2.1 Analysis of SCZ data

#### 1.2.1.1 Obtaining non-heterogeneous population samples for case-control data of SCZ

The case-control data sets were divided into three big populations: Finland, United Kingdom and Sweden. For the Sweden population, this was a large data set and was also sequenced at different centers [Genovese et al. \(2016\)](#), therefore we divided this population as follows.

A simple combination between a clustering process using a multivariate normal mixture model and a data analyzing strategy using linear and generalized linear models was used to divide the Sweden data into non-heterogeneous populations. [Genovese et al. \(2016\)](#) recently analyzed all case-control data sets by adjusting for multiple covariates: genotype gender of individuals (SEX), 20 principal components (PCs), year of birth of individuals (BIRTH), Aligent kit used in wet-labs (KIT) by using linear regression and generalized linear regression models as in Equation 1. They reported significant results for NoExAC LoF and MiD variants; therefore, this information was used in this step. We defined homogeneous populations as populations which were not much affected by the covariates. Thus, for the populations, analyzing results using Equation

1 (adjusting covariates) would not be much different from those results using Equation 2 (not adjusting covariates). The `mclust` package Version 5.2 [Fraley and Raftery \(1999\)](#) which uses a multivariate normal mixture model was used to divide 11,161 samples (4,929 cases and 6,232 controls) into different groups. To see all situations of the grouping process, we used `mclust` with three strategies on 11,161 samples: grouping all 20 PCs, grouping all 20 PCs and total counts, and grouping only the first three PCs. The number of groups were set between 2 and 6. For each clustering time, Equation 1 and 2 were used to calculate p values for each variant category of each group from the clustering results (p1 and p2 respectively); then, Spearman correlation [Spearman \(1904\)](#) between p-value results from the two Equations (cPvalue) was calculated. Next, to filter reliable results from the clustering process, we set criteria:

- cPvalue  $\geq 0.85$  and p-values for NoExAC  $\leq 0.005$ .
- Ratio p1/p2 from Equation 1 and 2 had to be between 0.1 and 1.

From results satisfied the above criteria, we manually chose groups which had similar results between Equation 2 and 1.

$$\begin{aligned} \text{logit}(P(SCZ = 1)) &\sim \text{count} + \text{countAll} + \text{sex} + \text{birth} + \text{kit} + \sum_{i=1}^{20} PC_i \\ \text{count} &\sim SCZ + \text{countAll} + \text{sex} + \text{birth} + \text{kit} + \sum_{i=1}^{20} PC_i \end{aligned} \quad (1)$$

$$\begin{aligned} SCZ &\sim \text{count} \\ \text{count} &\sim SCZ \end{aligned} \quad (2)$$

For the data from the UK10K project [Singh et al. \(2016\)](#), we divided the data into two separate populations England and Finland, and tested NoExAC variants in these populations by calculating sample-size-adjusted ratios between cases and controls. The ratios were 0.91 and 0.95 for the UK data. Regarding the Finland data, the ratio for MiD variants was only 0.41 which were extremely low. This could be a special case for the population or might be because of other technical reasons. We did not use this population in the next stage because it showed a different trend with other populations.

### 1.2.2 extTADA pipeline: extended transmission (case-control) and de novo analysis

This section describes more details the pipeline.

#### 1.2.2.1 extTADA for one *de novo* population and one case/control population

extTADA is summarized in Table S3 and Figure S2. There,  $x_{dn} \sim \text{Pois}(2N_d\mu, \gamma_{dn})$ ,  $x_{ca} \sim \text{Pois}(qN_1\gamma_{cc})$ ,  $x_{cn} \sim \text{Pois}(qN_0)$ , and  $\gamma_{dn} \sim \text{Gamma}(\tilde{\gamma}_{dn}\beta_{dn}, \beta_{dn})$ ,  $\gamma_{cc} \sim \text{Gamma}(\tilde{\gamma}_{cc}\beta_{cc}, \beta_{cc})$ ,  $q \sim \text{Gamma}(\rho, \nu)$ .

Let  $K$  be the number of categories (e.g., LoF, MiD), and  $x_i = (x_{i1}, \dots, x_{iK})$  be the vector of counts at the  $i^{th}$  given gene. The Bayes Factor for each  $j^{th}$  category to test two hypotheses:  $H_0 : \gamma = 1$  versus  $H_1 : \gamma \neq 1$  was:

$$\begin{aligned} B_{ij} &= \frac{P(x_{ij}|H_1)}{P(x_{ij}|H_0)} \\ &= \frac{\int P(x_{ij}|\gamma, q)P(q|H_1)P(\gamma|H_1)dq d\gamma}{\int P(x_{ij}|\gamma, q)P(q|H_0)P(\gamma|H_0)dq d\gamma} \\ &\quad \text{Because } \gamma = 1 \text{ for } H_0 \\ &= \frac{\int P(x_{ij}|\gamma, q)P(q|H_1)P(\gamma|H_1)dq d\gamma}{\int P(x_{ij}|q)P(q|H_0)dq} \end{aligned} \quad (3)$$

In Equation 3,  $x_{ij} = x_{dn}$  for *de novo* data and  $x_{ij} = (x_{ca}, x_{cn})$  for case-control data. In addition, the integral over  $q$  was not applicable for *de novo* data because there is no  $q$  parameter for *de novo* data.

As in He et al. (2013), the BF for the  $i^{th}$  gene combining all categories is:

$$B_i = \prod_{j=1}^K B_{ij} \quad (4)$$

To calculate BFs, hyper parameters in Table S3 need to be inferred. Let  $\phi_{1j}$  and  $\phi_{0j}$  be hyper-parameters for  $H_1$  and  $H_0$  respectively. A mixture model of the two hypotheses was used to infer parameters using information across the number of tested genes ( $m$ ) as:

$$P(x|\phi_1, \phi_0) = \prod_{i=1}^m \left[ \pi \prod_{j=1}^K P(x_{ij}|\phi_{1j}) + (1 - \pi) \prod_{j=1}^K P(x_{ij}|\phi_{0j}) \right] \quad (5)$$

Equation 5 was calculated across categories as in Equation 4.

We used the same approach for the analysis of multiple population samples. Let  $Ndn_{pop}$ ,  $Cdn$  and  $Ncc_{pop}$ ,  $Ccc$  be the number of populations, categories for *de novo* and case-control data respectively. The total Bayes Factor of a given gene was the product of Bayes Factors of all populations as in the main text, and all hyper parameters were estimated using Equation 2 in the main text.

The hyper-parameters  $\phi_{1j} = (\gamma_{j(dn)}, \gamma_{j(cc)}, \beta_{j(dn)}, \beta_{j(cc)}, \rho_j, \nu_j)$  were estimated using a Hamiltonian Monte Carlo (HMC) Markov chain Monte Carlo (MCMC) method implemented in the **rstan** package Carpenter et al. (2015); R Core Team (2016). However, the model was first simplified by removing  $q$  (see below).

### 1.2.2.2 Simplified approximate case-control model

For case-control (transmitted) data,  $q \sim \text{Gamma}(\rho, \nu)$ , and hyper-parameters  $\rho$  and  $\nu$  controlled the mean and dispersion of  $q$ ; therefore, as in the previous studies He et al. (2013); De Rubeis et al. (2014),  $\nu$  was heuristically chosen (200 was used in all analyses) and  $\frac{\rho}{\nu}$  = the mean frequency across genes in both cases and controls.

We simplified the case-control model by expressing it as

$$P(x_{ca}, x_{cn}|H_j) = P(x_{ca}|x_{ca} + x_{cn}, H_j)P(x_{ca} + x_{cn}|H_j) \quad (6)$$

Because  $x_{ca} \sim Pois(N_1 q \gamma_{cc})$  and  $x_{cn} \sim Pois(N_0 q)$ , assuming that  $x_{ca}$  and  $x_{cn}$  were **independent**, the case data could be modeled as:

$$x_{ca}|x_{ca} + x_{cn}, H_j \sim Binomial(x_{ca} + x_{cn}, \theta|H_j)$$

$$\text{with } \theta|H_1 = \frac{N_1 \gamma_{cc}}{N_1 \gamma_{cc} + N_0} \text{ and } \theta|H_0 = \frac{N_1}{N_1 + N_0}$$

The marginal likelihood was

$$P(x_{ca}|x_{ca} + x_{cn}, H_j) = \int P(x_{ca}|x_{ca} + x_{cn}, \gamma_{cc}, H_j)P(\gamma_{cc}|H_j)d\gamma_{cc}$$

Based on simulation results, the first part  $P(x_{ca}|x_{ca} + x_{cn}, H_j)$  can be used to infer mean RRs ( $\bar{\gamma}_{cc}$ ); therefore only this part was used in the **extTADA** estimation process. However, to calculate Bayes Factors, we used full case-control models. We changed the order of integrals (Supplementary Methods).

### 1.2.2.3 Control of an implied proportion of protective variants using the relative risk dispersion hyper-parameter

If  $\bar{\gamma}$  and  $\beta$  were small then we could see a high proportion of protective variants when  $\bar{\gamma}$  is not large. Although this might be of biological interest, it is not currently accounted for in the model. To control the proportion of protective variants, we tested the relationship between  $\beta$  and  $\bar{\gamma}$  in determining  $\int Gamma(\bar{\gamma}_{dn}\beta_{dn}, \beta_{dn})$ . We set this proportion very low (2%) (Figure S3) and built a nonlinear relationship  $\beta = e^{a*\bar{\gamma}^b + c}$ . The function *nls* in R was used to estimate a, b and c, as 6.77, -1.79 and -0.22 respectively.

### 1.2.2.4 Calculate Bayes Factor for case/control data

At a given gene, Bayes Factor for each class was calculated as  $BF = \frac{P(x_1, x_0|H_1)}{P(x_1, x_0|H_0)}$ . The probability for each model ( $H_j, j = 0, 1$ ) was calculated in order to rely only  $\gamma$  parameters as follows.

$$P(x_{ca}, x_{cn}|H_j) = P(x_{cn}|H_j)P(x_{ca}|x_{cn}, H_j) \quad (7)$$

- The first part  $P(x_{cn}|H_j)$  was the same as [De Rubeis et al. \(2014\)](#):

$$P(x_{cn}|H_j) = \int P(x_{cn}|q, H_j)P(q|\rho, \nu, H_j)dq = NegBin(x_{cn}|\rho, \frac{N_0}{\nu + N_0}), j = 0, 1 \quad (8)$$

- The second part:

$$\begin{aligned} P(x_{ca}|H_j, x_{cn}) &= \int P(x_{ca}|q, \gamma_{cc})P(q|H_j, x_{cn})P(\gamma_{cc}|H_j)dq d\gamma_{cc} \\ &= \int [P(x_{ca}|q, \gamma_{cc})P(q|H_j, x_{cn})dq] P(\gamma_{cc}|H_j)d\gamma_{cc} \\ &= \int NegBin(x_{ca}|\rho + x_{cn}, \frac{N_0 + \nu}{N_1 \gamma_{cc} + N_0 + \nu})P(\gamma_{cc}|H_j)d\gamma_{cc} \end{aligned} \quad (9)$$

To identify the lower and upper limits of  $\gamma_{CC}$  for the integral, we randomly sampled 10,000 times values from the  $Gamma(\bar{\gamma}_{cc} * \beta_{cc}, \beta_{cc})$  and used the minimum and maximum values for the lower and upper limits respectively.

### 1.2.3 Infer parameters using MCMC results

The `rstan` package [Carpenter et al. \(2015\)](#) was used to run MCMC processes. For simulation data, 5,000 times and a single chain were used. For real data, 20,000 times and three independent chains were used. In addition, for SCZ data we used two steps to obtain final results. Firstly, 10,000 times were run to obtain parameters. After that, we calculated  $\beta$  values from estimated mean RRs as the Equation described in Table [S3](#). Finally, `extTADA` was re-run 20,000 times on the SCZ data with calculated  $\beta$  values set as constants to re-estimate mean RRs and the proportions of risk genes. For each MCMC process, a burning period = a half of total running times was used to assure that chains did not rely on their initial values. For example, we ran and removed 2,500 burning times before the 5,000 running times for simulation data.

We just chose 1,000 samples of each chain from MCMC results to do further analyses. For example, with a chain with 20,000 run times, the step to obtain a sample was 20 run times. For all estimated parameters from MCMC chains, the convergence of each parameter was diagnosed using the estimated potential scale reduction statistic ( $\hat{R}$ ) introduced in `Stan` [Carpenter et al. \(2015\)](#). To produce heatmap plots, modes as well as the credible intervals (CIs) of estimated parameters, the `Locfit Loader` [\(2007\)](#) was used. The mode values were used as our estimated values for other calculations.

### 1.3 Supplementary Figures

This file includes Sup Figures below.

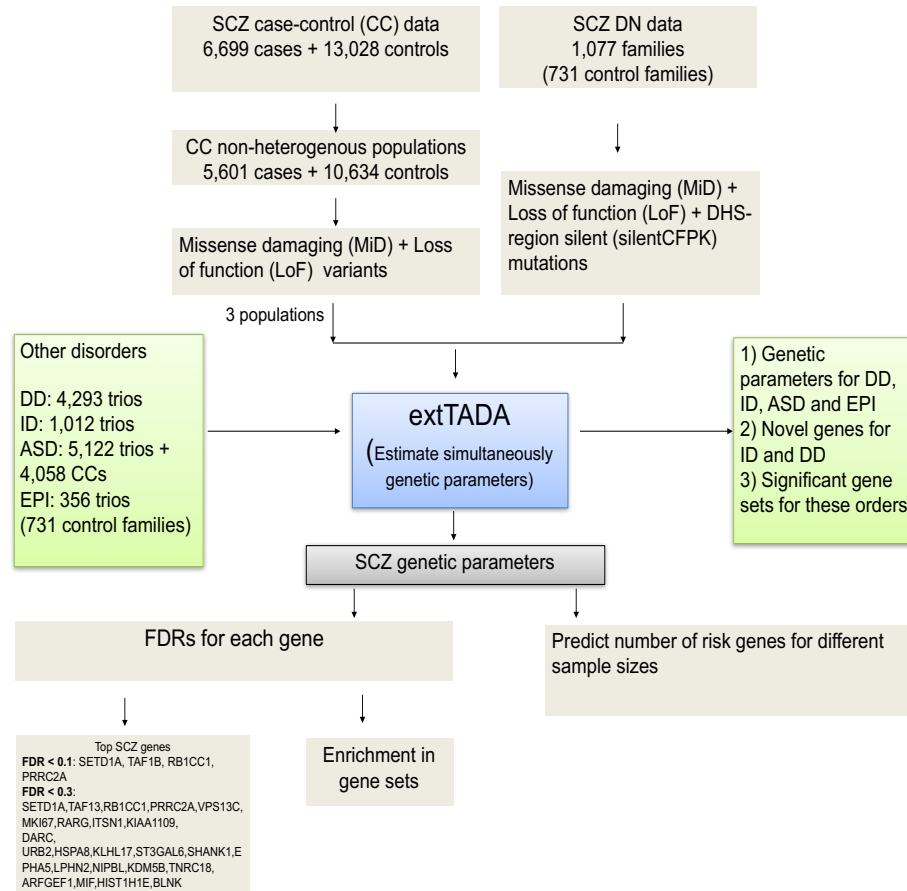

Figure S1: Workflow of data analysis.

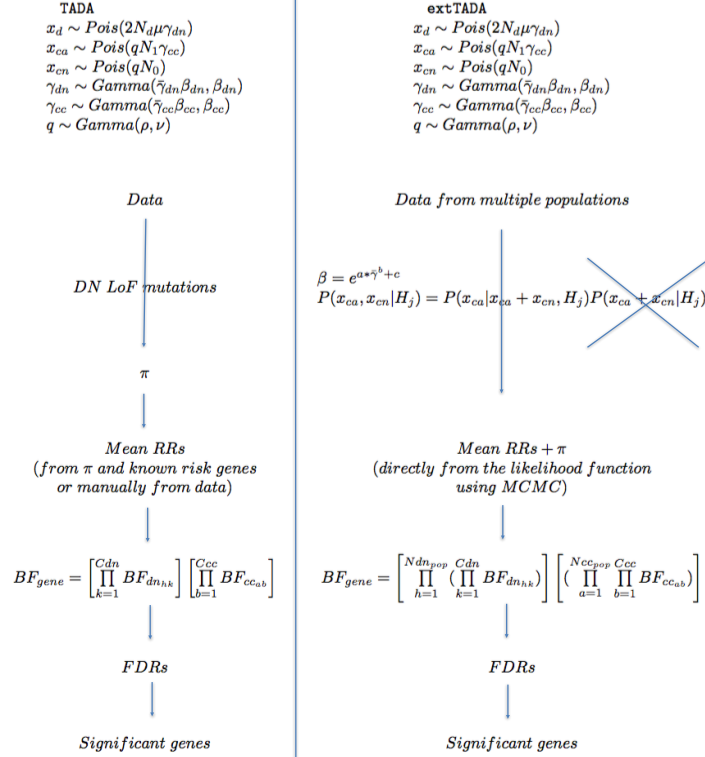

Figure S2: Comparison between **TADA** and **extTADA**. They both use the same model for *de novo* data ( $x_{dn}$  and case/control ( $x_{ca}, x_{cn}$ ) data. **extTADA** combines all categories to obtain parameters and their credible intervals while **TADA** is based on LoF mutations. **extTADA** uses an approximate model for case-control data, and constrains  $\beta$  and  $\gamma$  in the estimation process. **extTADA** is designed to work for multiple populations. **TADA** can be used inside **extTADA**.



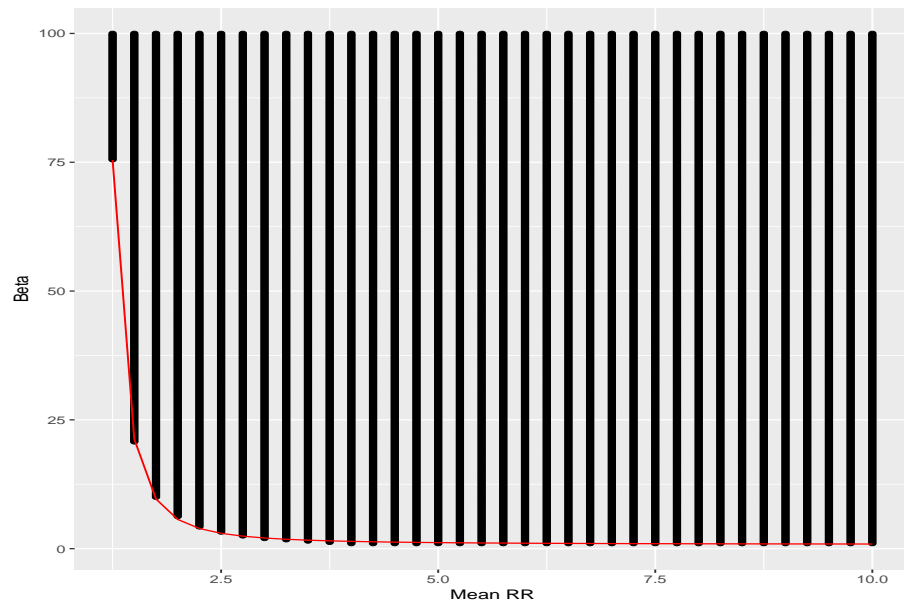

Figure S3: A grid of  $\beta$  and  $\bar{\gamma}$  values. Points on the red line are corresponding with the proportion of protective variants less than 2%.

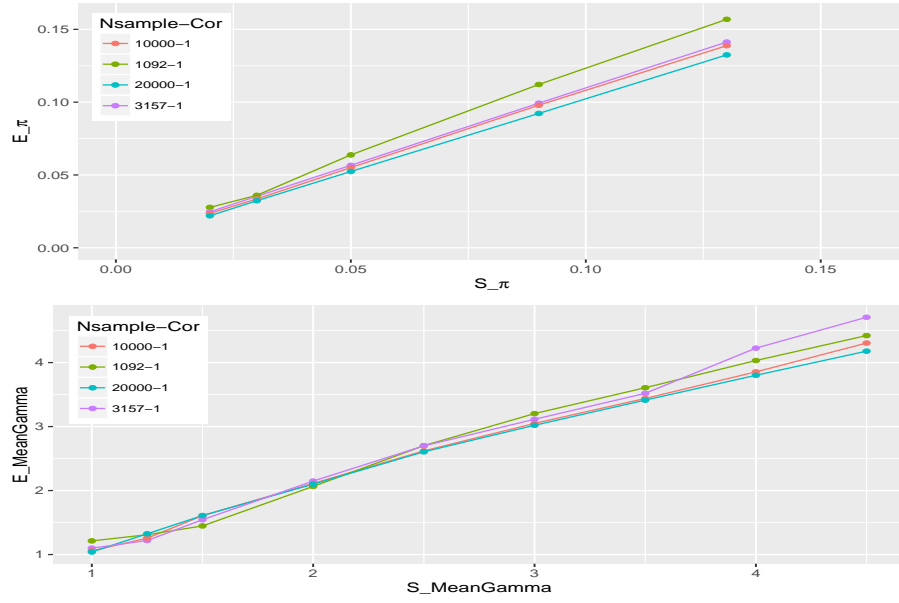

Figure S4: Correlations between estimated and simulated values for one CC class with different sample sizes. X and Y axes describe simulated (S) and estimated (E) values respectively. The top picture is for mean relative risks (MeanRRs) while the bottom picture is for the proportion of risk genes ( $\pi$ ). Legends show sample sizes and correlations. These estimated values were averaged across simulation results. Detailed values are presented in Figure S5.

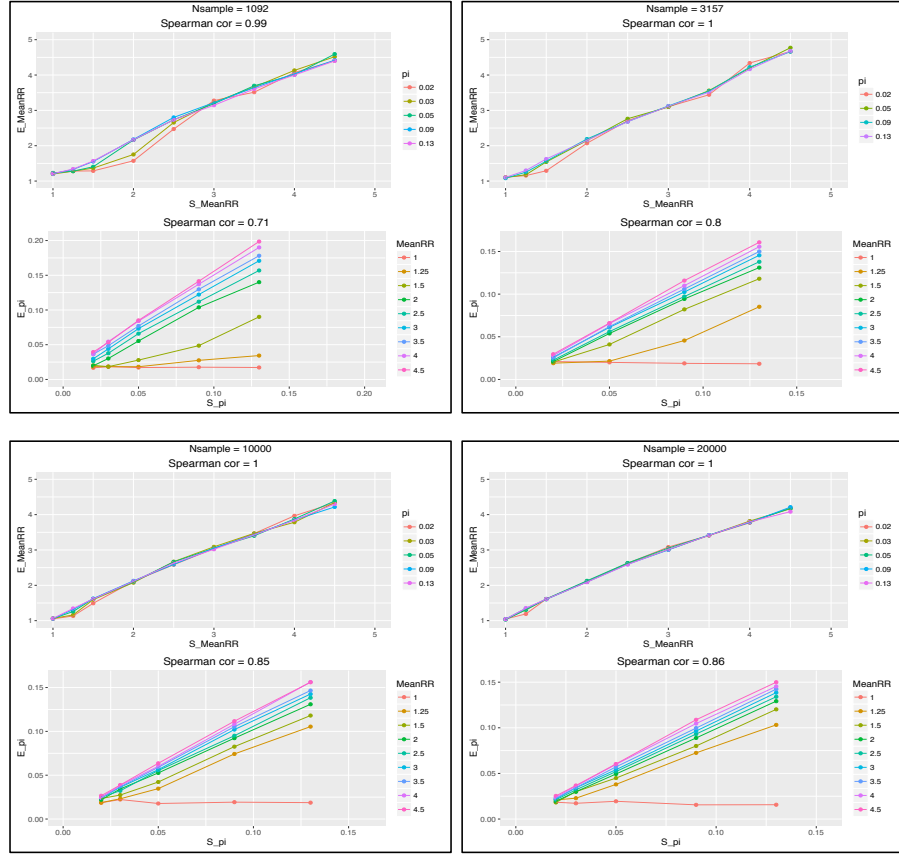

Figure S5: Correlation between simulated and estimated values for one-category case/control data.

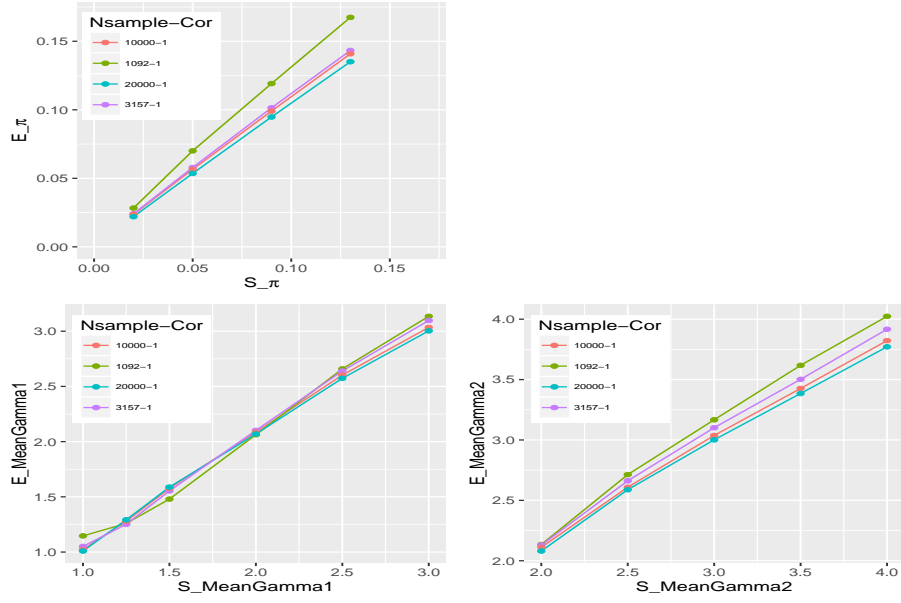

Figure S6: Correlations between estimated and simulated values for two CC class with different sample sizes. X and Y axes describe simulated (S) and estimated (E) values respectively. A range of mean relative risks for two classes (MeanGamma1 and MeanGamma2) and risk-gene proportions ( $\pi$ ) were used in the simulation process. Legends show sample sizes and correlations. These estimated values were averaged across simulation results. Detailed values are presented in Figure S7.

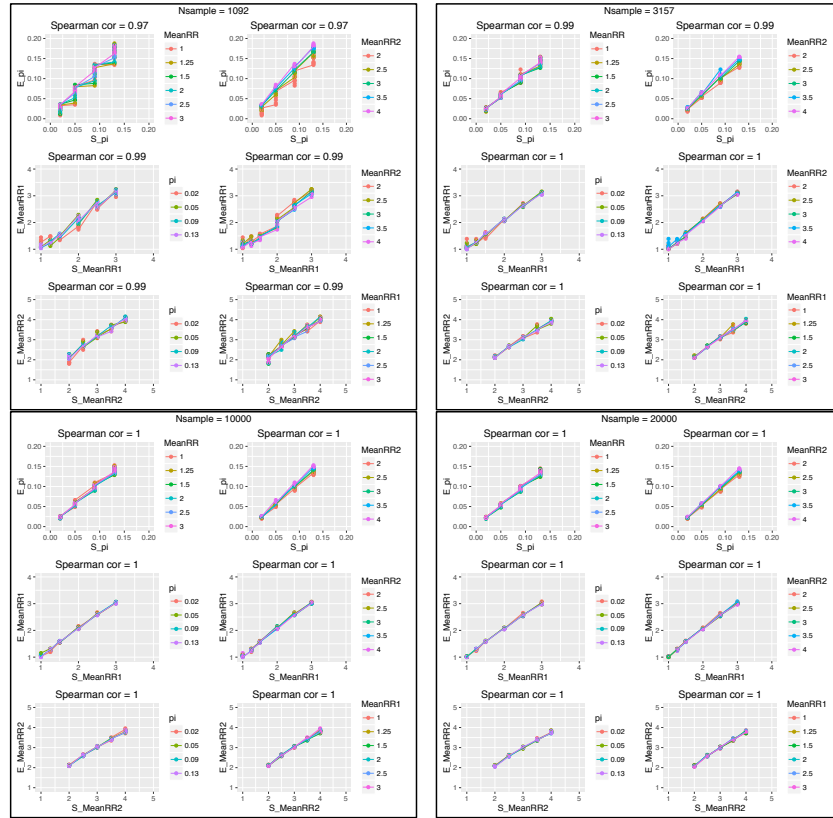

Figure S7: Correlation between simulated and estimated values for two-category case/control data.

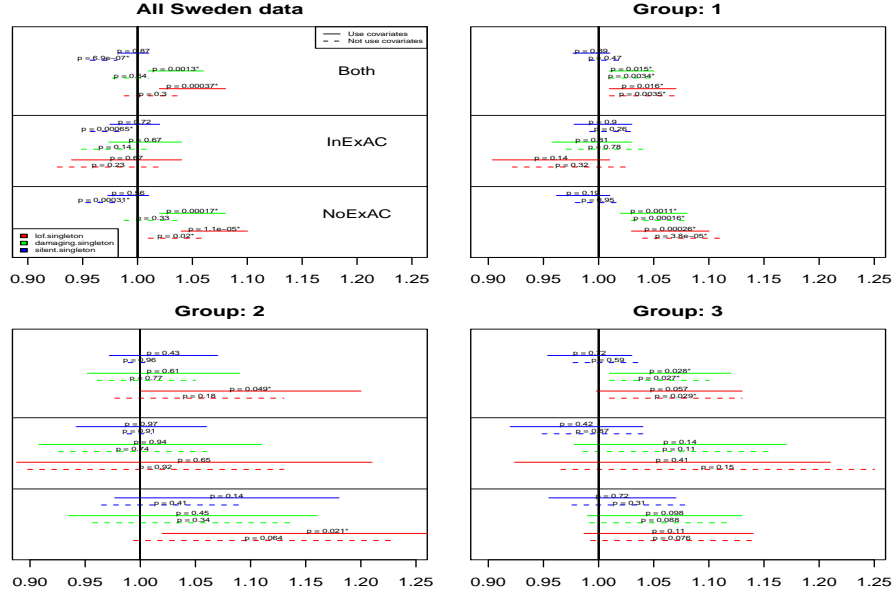

Figure S8: Odds ratios for the analysis of all case-control samples. Top left picture shows odds ratios for all Sweden samples while the three other pictures show odds ratios for three groups after the clustering process. Only group 1 and 3 are used in the current analysis because there are strong differences between results using covariates and not using covariates in group 2. P values were calculated for variants in (InExAC), not in (NoExAC) the ExAC database, and all variants (Both).

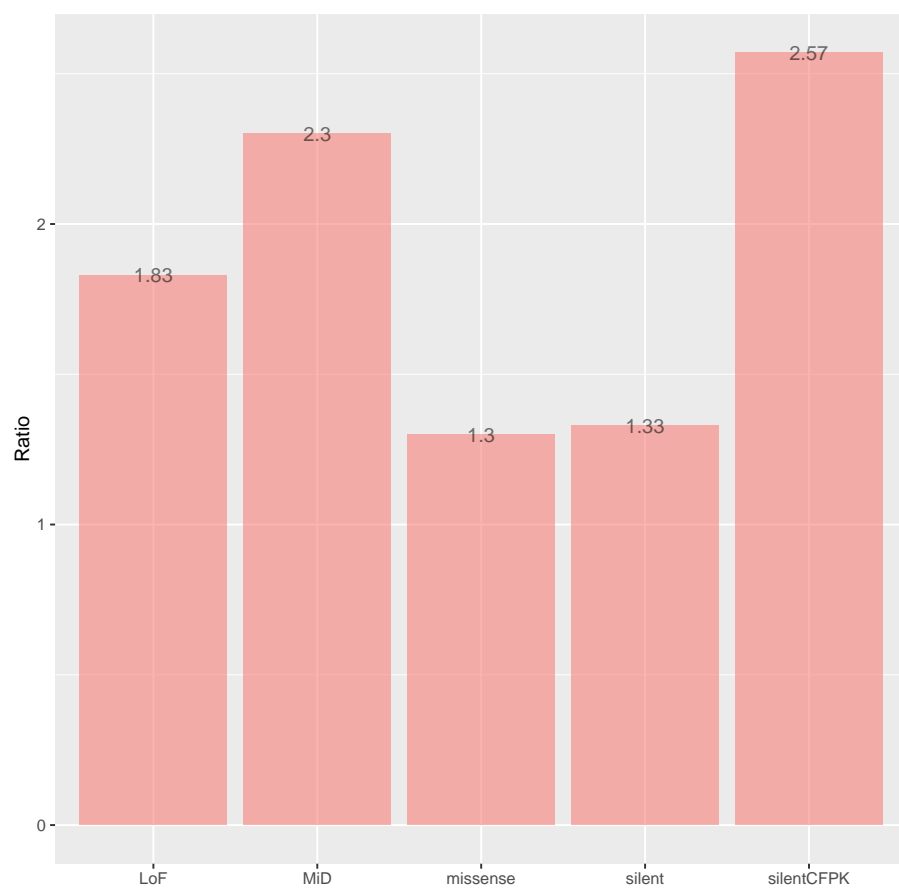

Figure S9: Ratios of *de novo* mutations between SCZ probands and controls (unaffected siblings). "silentFCPk" describes for silent mutations within frontal cortex-derived DHS (silentCerebrumfrontalocPk.narrowPeak). MiD mutations are missense mutations derived from 7 methods.

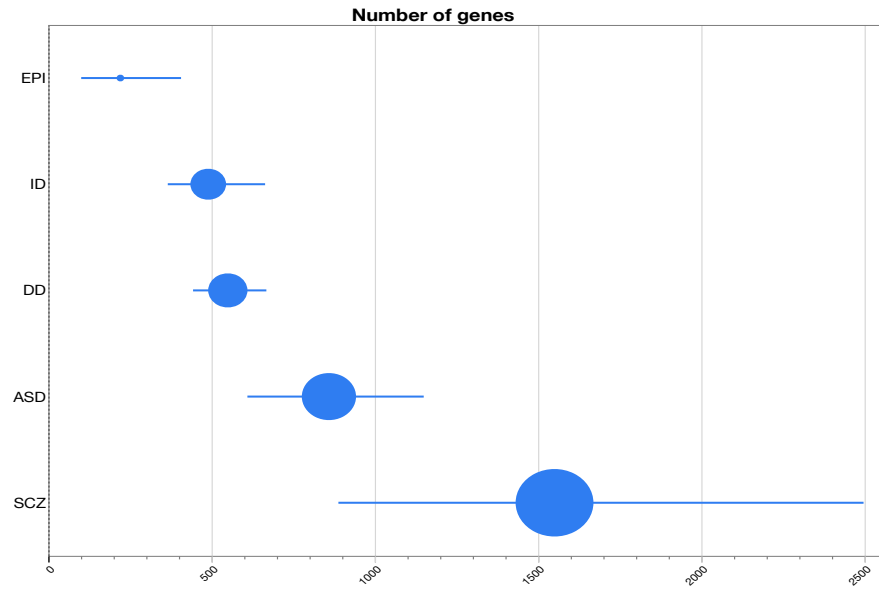

Figure S10: Estimated gene counts for all disorders, with 95% CIs. Point sizes are proportional to sample sizes.

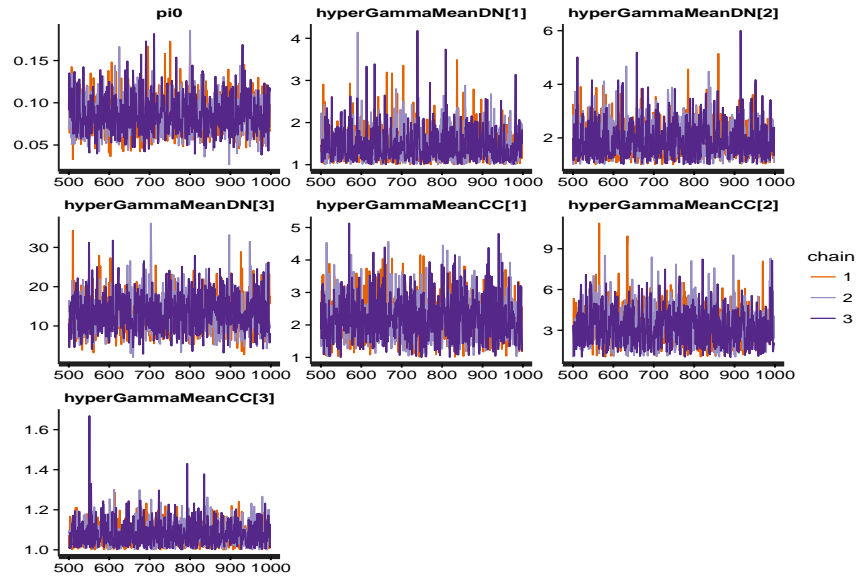

Figure S11: MCMC results for SCZ data.



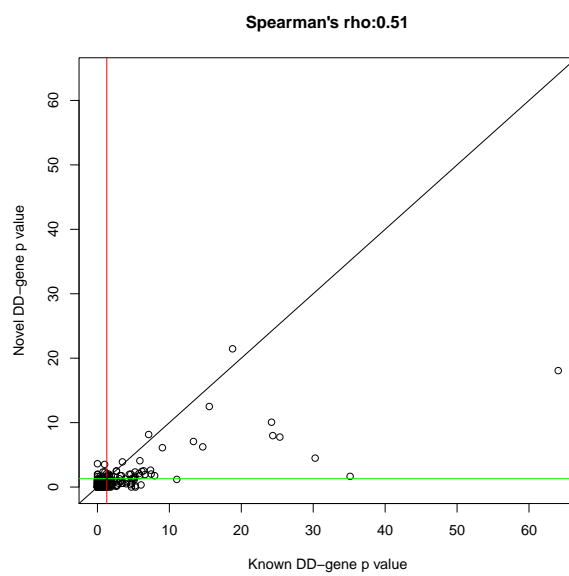

Figure S12: The correlation of gene-set p values (values are  $-\log_{10}(\text{p values})$ ) between known and novel genes from **extTADA** results for DD

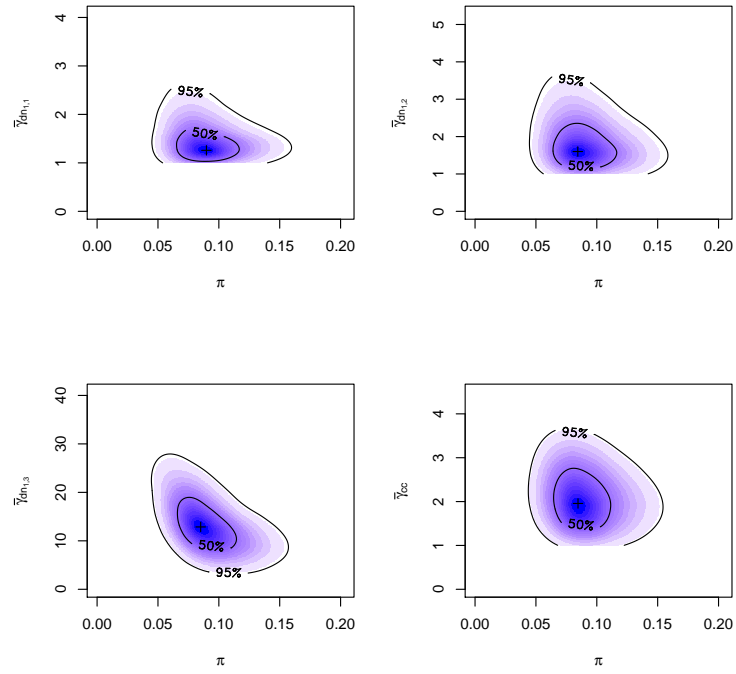

Figure S13: SCZ genetic parameters when mean RRs of case-control data are equal.

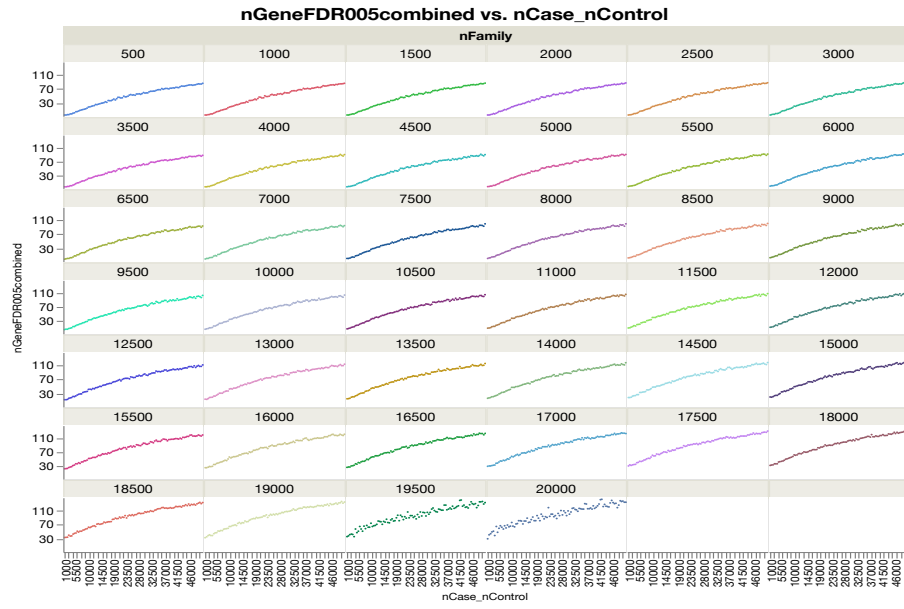

Figure S14: Number of risk genes with different sample sizes based on genetic architecture predicted by extTADA. Case/control number is only for cases (with equal controls) (x-axis); each panel shows results for a given number of trios.

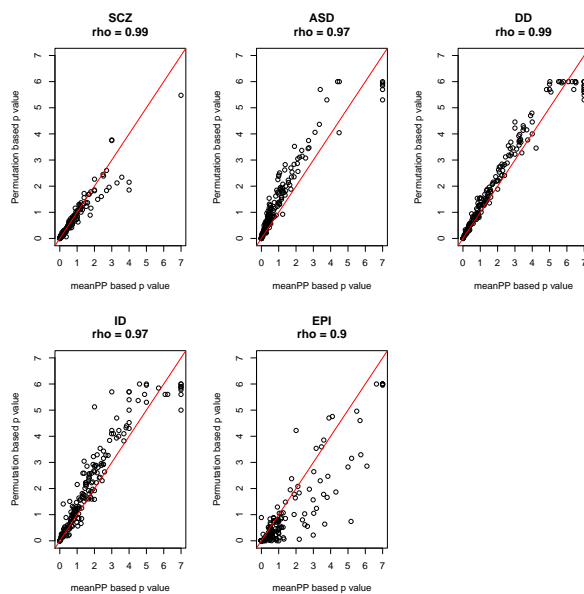

Figure S15: The correlation of gene-set p values ( $-\log(\text{p value})$ ) between mean posterior profitability (meanPP) based method and permutation based methods.

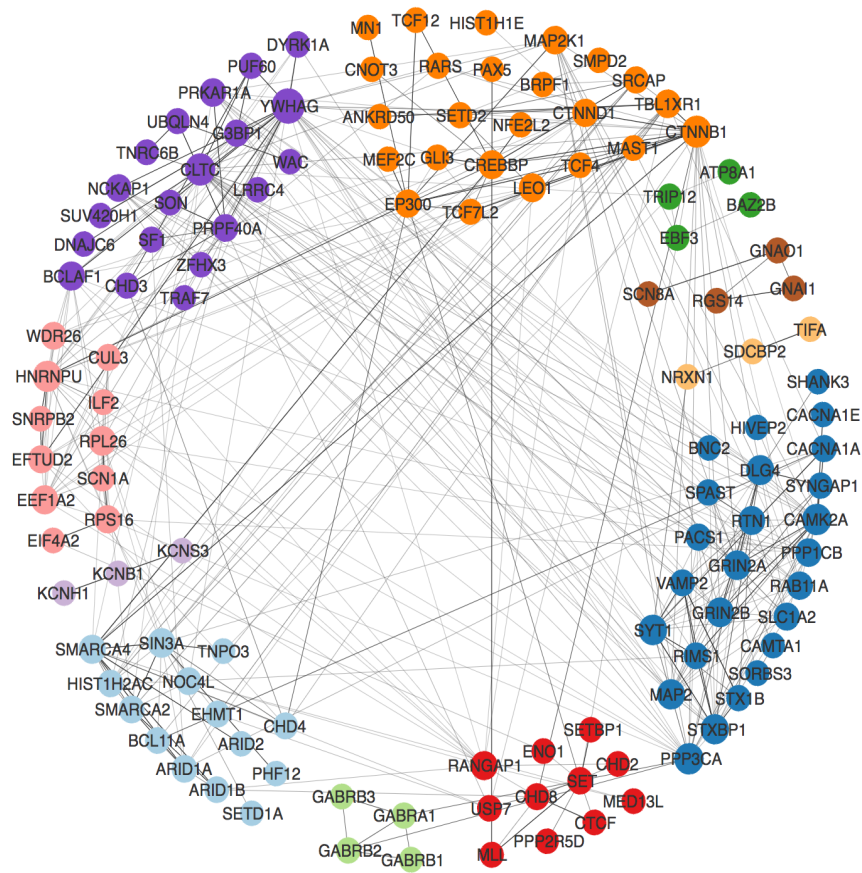

Figure S16: GeNets InWeb PPI network for 288 NDD genes, with direct edges only.

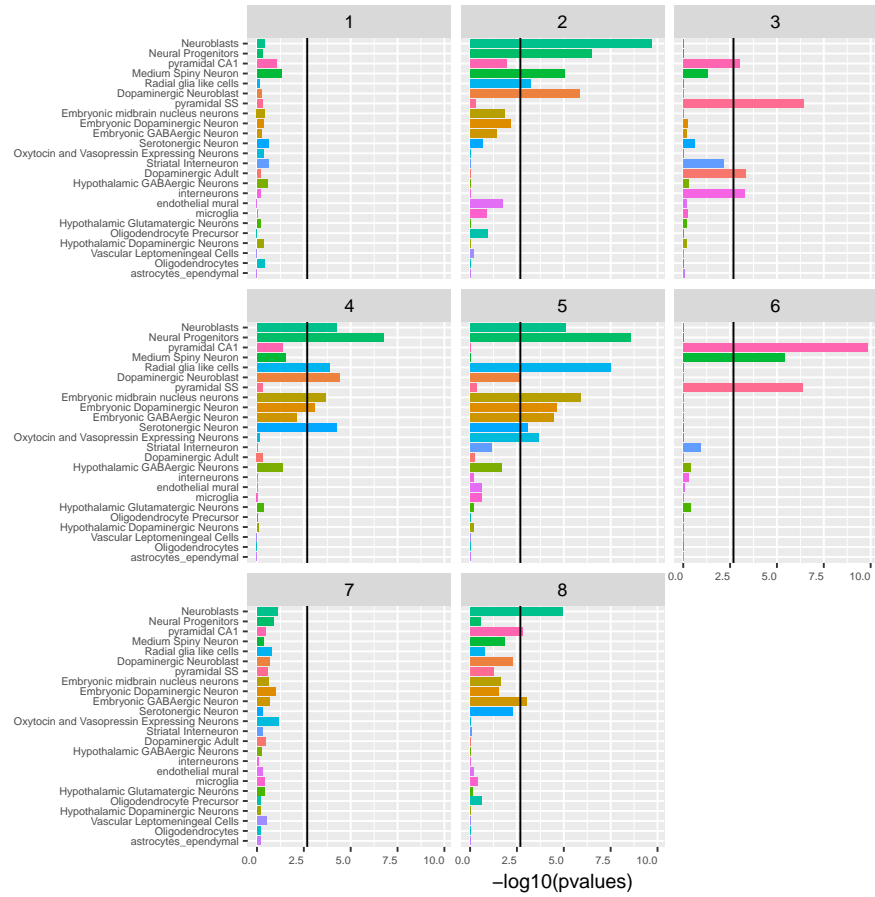

Figure S17: Evaluation of enrichment of each community from GeNets results in brain scRNAseq datasets from mouse.

## 1.4 Supplementary Tables

This part includes Sup Tables below.

| Source                                           | Disease | DN   | DN control       | Case                   | Control                |
|--------------------------------------------------|---------|------|------------------|------------------------|------------------------|
| Fromer et al. (2014)                             | SCZ     | 617  | 84               | 4954/4248<br>1745/1353 | 6239/5865<br>6789/4769 |
| Girard et al. (2011)                             | SCZ     | 14   |                  |                        |                        |
| Gulsuner et al. (2013)                           | SCZ     | 105  |                  |                        |                        |
| McCarthy et al. (2014)                           | SCZ     | 57   |                  |                        |                        |
| Xu et al. (2012)                                 | SCZ     | 231  |                  |                        |                        |
| Guipponi et al. (2014)                           | SCZ     | 53   |                  |                        |                        |
| Genovese et al. (2016)                           | SCZ     |      |                  |                        |                        |
| Singh et al. (2016)                              | SCZ     |      |                  |                        |                        |
| Deciphering Developmental Disorders Study (2017) | DD      | 4293 |                  |                        |                        |
| EuroEPINOMICS-RES Consortium et al. (2014)       | EPI     | 356  |                  |                        |                        |
| De Ligt et al. (2012)                            | ID      | 100  | 20               |                        |                        |
| Hamdan et al. (2014)                             | ID      | 41   |                  |                        |                        |
| Rauch et al. (2012)                              | ID      | 51   |                  |                        |                        |
| Lelieveld et al. (2016)                          | ID      | 820  |                  |                        |                        |
| Turner et al. (2016)                             | ASD     | 5122 | 343<br>50<br>200 | 404                    | 3654                   |
| De Rubeis et al. (2014)                          | ASD     |      |                  |                        |                        |
| Iossifov et al. (2012)                           | ASD     |      |                  |                        |                        |
| ORoak et al. (2012)                              | ASD     |      |                  |                        |                        |
| Sanders et al. (2012)                            | ASD     |      |                  |                        |                        |

Table S1: *de novo* and case/control data. For ASD studies, Turner et al. (2016) integrated previous results in their study; therefore only *de novo* meta data in their study are shown in the table. In addition, for ASD case-control data, only one homogeneous Sweden population from De Rubeis et al. (2014) was used. For case-control data of SCZ, after correcting for the population stratification, only 4,248 cases (3,157 + 1,091) + 5,865 (4,672 + 1,193) controls from Genovese et al. (2016) and 1,353 cases + 4,769 controls from Singh et al. (2016) are used in this study.

| Gene set name                                             | Abbreviation                                                                                  | Author                                           |
|-----------------------------------------------------------|-----------------------------------------------------------------------------------------------|--------------------------------------------------|
| Missense constrained genes                                | constrained                                                                                   | <a href="#">Samocha et al. (2014)</a>            |
| Loss-of-function tolerance genes                          | pLI90                                                                                         | <a href="#">Lek et al. (2015)</a>                |
| RBFOX2 and RBFOX1/3 genes                                 | rbfox2, rbfox13                                                                               | <a href="#">Weyn-Vanhentenryck et al. (2014)</a> |
| FMRP genes                                                | fmrp                                                                                          | <a href="#">Darnell et al. (2011)</a>            |
| CELF4 genes                                               | celf4                                                                                         | <a href="#">Wagnon et al. (2012)</a>             |
| synaptic genes                                            | synaptome                                                                                     | <a href="#">Pirooznia et al. (2012)</a>          |
| microRNA-137                                              | mir137                                                                                        | <a href="#">Robinson et al. (2015)</a>           |
| PSD-95 complex genes                                      | psd95                                                                                         | <a href="#">Bayés et al. (2011)</a>              |
| ARC and NMDA receptors genes                              | nmdarc                                                                                        | <a href="#">Kirov et al. (2012)</a>              |
| Essential genes                                           | essential                                                                                     | <a href="#">Ji et al. (2016)</a>                 |
| Human accelerated regions and primate accelerated regions | HARs, PARS                                                                                    | <a href="#">Lindblad-Toh et al. (2011)</a>       |
| Known ID gene sets                                        | IDallKnownGenes                                                                               | <a href="#">Lelieveld et al. (2016)</a>          |
| Voltage-gated Calcium Channel Genes                       | vacc                                                                                          |                                                  |
| CHD8 promoter targets                                     | chd8 hNSC, chd8 hNSC specific, chd8 human brain, chd8 hNSC human brain, chd8 hNSC human mouse | <a href="#">Cotney et al. (2015)</a>             |
| Allelic-biased expression genes in neurons                | AlleleBiasedExpression.Neuron                                                                 | <a href="#">Lin et al. (2012)</a>                |
| 24 gene sets from 24 modules                              | Module.M1..M24                                                                                | <a href="#">Johnson et al. (2016)</a>            |
| <i>de novo</i> copy number variants                       |                                                                                               | <a href="#">Genovese et al. (2016)</a>           |
| ASD                                                       | CNV.denovo.gain/loss.asd                                                                      |                                                  |
| Bipolar                                                   | CNV.denovo.gain/loss.bd                                                                       |                                                  |
| SCZ                                                       | CNV.denovo.gain/loss.scz                                                                      |                                                  |
| MiD and LoF <i>de novo</i> mutations                      |                                                                                               |                                                  |
| DD                                                        | DD.allDenovoMiDandLoF                                                                         |                                                  |
| ASD                                                       | ASD.allDenovoMiDandLoF                                                                        |                                                  |
| EPI                                                       | EPI.allDenovoMiDandLoF                                                                        |                                                  |
| ID                                                        | ID.allDenovoMiDandLoF                                                                         |                                                  |

Table S2: Abbreviations of known gene sets used in this study.



| <i>Data model</i>                      | <i>Parameter prior</i>                                                                                                                                          | <i>Hyper prior</i>                                                                                                                                               |
|----------------------------------------|-----------------------------------------------------------------------------------------------------------------------------------------------------------------|------------------------------------------------------------------------------------------------------------------------------------------------------------------|
| $x_{dn} \sim P(2N_{dn}\mu\gamma_{dn})$ | $\gamma_{dn} \sim \text{Gamma}(\bar{\gamma}_{dn} * \beta_{dn}, \beta_{dn})$<br>$\beta_{dn} = e^{a*\bar{\gamma}_{dn}^b + c}$                                     | $\bar{\gamma}_{dn} \sim \text{Gamma}(\bar{\bar{\gamma}}_{dn}, \bar{\bar{\beta}}_{dn})$                                                                           |
| $x_{ca} \sim P(N_1 q \gamma_{cc})$     | $\gamma_{cc} \sim \text{Gamma}(\bar{\gamma}_{cc} * \beta_{cc}, \beta_{cc})$<br>$\beta_{cc} = e^{a*\bar{\gamma}_{cc}^b + c}$<br>$q \sim \text{Gamma}(\rho, \nu)$ | $\bar{\gamma}_{cc} \sim \text{Gamma}(\bar{\bar{\gamma}}_{cc}, \bar{\bar{\beta}}_{cc})$<br>$\frac{\rho}{\nu} = \text{mean}(\sum(x_{cn} + x_{ca}))$<br>$\nu = 200$ |
| $x_{cn} \sim P(N_0 q)$                 | $q \sim \text{Gamma}(\rho, \nu)$                                                                                                                                | $\frac{\rho}{\nu} = \text{mean}(\sum(x_{cn} + x_{ca}))$<br>$\nu = 200$                                                                                           |
|                                        | $\pi \sim \text{Beta}(1, 5)$                                                                                                                                    |                                                                                                                                                                  |

Table S3: Parameter information used in all analyses.  $N_{dn}, N_1, N_0$  are sample sizes of families, cases and controls respectively.  $\bar{\gamma}$  is mean RRs and  $\beta$  controls the dispersion of  $\gamma$ .  $\bar{\bar{\gamma}}$  and  $\bar{\bar{\beta}}$  are priors for  $\bar{\gamma}$  and are set in advance (they are inferred from simulation data).  $\beta$  is inferred from the equation  $e^{a*\bar{\gamma}^b + c}$  inside the estimation process with  $a = 6.83$ ,  $b = -1.29$  and  $c = -0.58$ .

| Parameter           |      | Q50    | Q5      | Q95     |
|---------------------|------|--------|---------|---------|
| $\pi$               | 0.02 | 0.0224 | 0.0125  | 0.0253  |
|                     | 0.05 | 0.0535 | 0.0351  | 0.0611  |
|                     | 0.09 | 0.0965 | 0.0752  | 0.1063  |
|                     | 0.13 | 0.1381 | 0.11    | 0.149   |
| $\bar{\gamma}_{DN}$ | 5    | 4.265  | 3.5608  | 4.947   |
|                     | 10   | 8.575  | 5.7255  | 10.4417 |
|                     | 15   | 13.23  | 9.9955  | 15.925  |
|                     | 20   | 17.07  | 14.2005 | 20.3087 |
| $\bar{\gamma}_{CC}$ | 1.5  | 1.64   | 1.5938  | 1.7888  |
|                     | 2    | 2.21   | 2.1638  | 2.2662  |
|                     | 2.5  | 2.76   | 2.7138  | 2.8575  |
|                     | 3    | 3.225  | 3.14    | 3.31    |
|                     | 3.5  | 3.675  | 3.5812  | 3.7663  |

Table S4: Simulated and estimated values of *de novo* (DN) and case-control (CC) parameters. Q50, Q5 and Q95 are for quantile values of 0.5, 0.05 and 0.95 respectively.

| pi   | dn_RR | cc_RR | e.pi   | Q50    | Q5     | Q95   | e.dn_RR | Q50   | Q5   | Q95  | e.cc_RR | Q50  | Q5   | Q95  |
|------|-------|-------|--------|--------|--------|-------|---------|-------|------|------|---------|------|------|------|
| 0.02 | 5     | 1.5   | 0.0126 | 0.0051 | 0.0224 | 4.72  | 2.65    | 9.22  | 1.83 | 1.70 | 2.53    | 1.83 | 1.70 | 2.53 |
| 0.02 | 5     | 2     | 0.0158 | 0.0054 | 0.0394 | 4.08  | 2.33    | 11.88 | 2.27 | 1.88 | 3.01    | 2.27 | 1.88 | 3.01 |
| 0.02 | 5     | 2.5   | 0.0230 | 0.0093 | 0.0419 | 3.49  | 2.05    | 10.25 | 2.83 | 2.22 | 3.43    | 2.83 | 2.22 | 3.43 |
| 0.02 | 5     | 3     | 0.0219 | 0.0123 | 0.0355 | 3.52  | 2.06    | 8.49  | 3.31 | 2.74 | 4.25    | 3.31 | 2.74 | 4.25 |
| 0.02 | 5     | 3.5   | 0.0269 | 0.0171 | 0.0373 | 3.76  | 2.10    | 9.59  | 3.80 | 3.15 | 4.73    | 3.80 | 3.15 | 4.73 |
| 0.02 | 10    | 1.5   | 0.0185 | 0.0085 | 0.0280 | 5.72  | 2.82    | 10.08 | 1.80 | 1.54 | 2.57    | 1.80 | 1.54 | 2.57 |
| 0.02 | 10    | 2     | 0.0176 | 0.0076 | 0.0373 | 5.22  | 2.55    | 13.43 | 2.24 | 1.85 | 3.05    | 2.24 | 1.85 | 3.05 |
| 0.02 | 10    | 2.5   | 0.0218 | 0.0118 | 0.0342 | 5.13  | 2.39    | 17.29 | 2.80 | 2.27 | 3.57    | 2.80 | 2.27 | 3.57 |
| 0.02 | 10    | 3     | 0.0227 | 0.0137 | 0.0344 | 7.29  | 2.35    | 15.88 | 3.28 | 2.64 | 4.23    | 3.28 | 2.64 | 4.23 |
| 0.02 | 10    | 3.5   | 0.0255 | 0.0163 | 0.0328 | 7.87  | 2.79    | 14.28 | 3.73 | 3.07 | 4.69    | 3.73 | 3.07 | 4.69 |
| 0.02 | 15    | 1.5   | 0.0152 | 0.0046 | 0.0315 | 11.63 | 4.65    | 28.84 | 1.77 | 1.48 | 2.67    | 1.77 | 1.48 | 2.67 |
| 0.02 | 15    | 2     | 0.0213 | 0.0091 | 0.0348 | 10.19 | 3.32    | 23.63 | 2.25 | 1.86 | 2.84    | 2.25 | 1.86 | 2.84 |
| 0.02 | 15    | 2.5   | 0.0230 | 0.0118 | 0.0377 | 9.73  | 4.00    | 20.84 | 2.69 | 2.06 | 3.50    | 2.69 | 2.06 | 3.50 |
| 0.02 | 15    | 3     | 0.0226 | 0.0128 | 0.0370 | 10.51 | 3.53    | 21.52 | 3.18 | 2.55 | 4.11    | 3.18 | 2.55 | 4.11 |
| 0.02 | 15    | 3.5   | 0.0240 | 0.0140 | 0.0364 | 10.56 | 3.58    | 20.62 | 3.62 | 3.04 | 4.70    | 3.62 | 3.04 | 4.70 |
| 0.02 | 20    | 1.5   | 0.0138 | 0.0062 | 0.0398 | 14.96 | 5.47    | 47.26 | 1.68 | 1.35 | 2.29    | 1.68 | 1.35 | 2.29 |
| 0.02 | 20    | 2     | 0.0188 | 0.0079 | 0.0363 | 14.10 | 4.79    | 36.13 | 2.28 | 1.81 | 3.20    | 2.28 | 1.81 | 3.20 |
| 0.02 | 20    | 2.5   | 0.0233 | 0.0110 | 0.0343 | 13.61 | 5.67    | 26.36 | 2.76 | 2.12 | 3.54    | 2.76 | 2.12 | 3.54 |
| 0.02 | 20    | 3     | 0.0243 | 0.0140 | 0.0371 | 13.89 | 6.44    | 23.95 | 3.41 | 2.63 | 4.30    | 3.41 | 2.63 | 4.30 |
| 0.02 | 20    | 3.5   | 0.0240 | 0.0146 | 0.0352 | 14.87 | 6.90    | 24.81 | 3.77 | 2.96 | 4.65    | 3.77 | 2.96 | 4.65 |
| 0.05 | 5     | 1.5   | 0.0343 | 0.0120 | 0.0688 | 4.55  | 2.26    | 14.06 | 1.71 | 1.51 | 2.17    | 1.71 | 1.51 | 2.17 |
| 0.05 | 5     | 2     | 0.0479 | 0.0279 | 0.0699 | 4.86  | 2.32    | 10.44 | 2.21 | 1.88 | 2.60    | 2.21 | 1.88 | 2.60 |
| 0.05 | 5     | 2.5   | 0.0556 | 0.0351 | 0.0743 | 4.59  | 2.06    | 8.03  | 2.81 | 2.31 | 3.17    | 2.81 | 2.31 | 3.17 |
| 0.05 | 5     | 3     | 0.0558 | 0.0427 | 0.0722 | 4.36  | 2.08    | 8.18  | 3.35 | 2.91 | 3.74    | 3.35 | 2.91 | 3.74 |
| 0.05 | 5     | 3.5   | 0.0621 | 0.0435 | 0.0727 | 3.65  | 1.89    | 7.36  | 3.73 | 3.22 | 4.48    | 3.73 | 3.22 | 4.48 |
| 0.05 | 10    | 1.5   | 0.0381 | 0.0161 | 0.0723 | 9.20  | 3.92    | 15.41 | 1.74 | 1.45 | 2.18    | 1.74 | 1.45 | 2.18 |
| 0.05 | 10    | 2     | 0.0531 | 0.0293 | 0.0801 | 8.71  | 3.70    | 12.99 | 2.26 | 1.91 | 2.71    | 2.26 | 1.91 | 2.71 |
| 0.05 | 10    | 2.5   | 0.0528 | 0.0386 | 0.0727 | 8.76  | 4.15    | 14.48 | 2.74 | 2.47 | 3.11    | 2.74 | 2.47 | 3.11 |
| 0.05 | 10    | 3     | 0.0569 | 0.0416 | 0.0737 | 8.22  | 4.47    | 13.57 | 3.25 | 2.83 | 3.72    | 3.25 | 2.83 | 3.72 |
| 0.05 | 10    | 3.5   | 0.0615 | 0.0491 | 0.0733 | 8.06  | 3.97    | 13.17 | 3.66 | 3.30 | 4.29    | 3.66 | 3.30 | 4.29 |
| 0.05 | 15    | 1.5   | 0.0406 | 0.0182 | 0.0877 | 13.51 | 6.94    | 24.71 | 1.67 | 1.43 | 1.98    | 1.67 | 1.43 | 1.98 |
| 0.05 | 15    | 2     | 0.0489 | 0.0311 | 0.0723 | 14.04 | 8.16    | 22.70 | 2.19 | 1.90 | 2.61    | 2.19 | 1.90 | 2.61 |
| 0.05 | 15    | 2.5   | 0.0522 | 0.0327 | 0.0734 | 13.13 | 8.28    | 20.66 | 2.72 | 2.38 | 3.11    | 2.72 | 2.38 | 3.11 |
| 0.05 | 15    | 3     | 0.0577 | 0.0449 | 0.0732 | 12.37 | 7.27    | 18.59 | 3.19 | 2.83 | 3.75    | 3.19 | 2.83 | 3.75 |
| 0.05 | 15    | 3.5   | 0.0607 | 0.0465 | 0.0756 | 11.97 | 8.23    | 18.55 | 3.61 | 3.11 | 4.29    | 3.61 | 3.11 | 4.29 |
| 0.05 | 20    | 1.5   | 0.0418 | 0.0205 | 0.0814 | 18.37 | 9.74    | 32.56 | 1.63 | 1.37 | 1.97    | 1.63 | 1.37 | 1.97 |
| 0.05 | 20    | 2     | 0.0482 | 0.0325 | 0.0697 | 17.08 | 10.14   | 29.26 | 2.27 | 1.91 | 2.60    | 2.27 | 1.91 | 2.60 |
| 0.05 | 20    | 2.5   | 0.0537 | 0.0406 | 0.0733 | 16.59 | 10.57   | 23.23 | 2.77 | 2.29 | 3.06    | 2.77 | 2.29 | 3.06 |
| 0.05 | 20    | 3     | 0.0569 | 0.0424 | 0.0770 | 16.15 | 10.37   | 24.32 | 3.23 | 2.84 | 3.75    | 3.23 | 2.84 | 3.75 |
| 0.05 | 20    | 3.5   | 0.0596 | 0.0449 | 0.0765 | 15.50 | 10.23   | 21.45 | 3.75 | 3.19 | 4.61    | 3.75 | 3.19 | 4.61 |
| 0.09 | 5     | 1.5   | 0.0767 | 0.0404 | 0.1207 | 4.46  | 2.17    | 9.59  | 1.66 | 1.51 | 1.97    | 1.66 | 1.51 | 1.97 |
| 0.09 | 5     | 2     | 0.0904 | 0.0666 | 0.1115 | 4.52  | 2.04    | 7.33  | 2.23 | 2.03 | 2.54    | 2.23 | 2.03 | 2.54 |
| 0.09 | 5     | 2.5   | 0.0963 | 0.0753 | 0.1256 | 4.70  | 2.52    | 7.54  | 2.79 | 2.49 | 3.11    | 2.79 | 2.49 | 3.11 |
| 0.09 | 5     | 3     | 0.1040 | 0.0879 | 0.1217 | 3.90  | 2.08    | 6.71  | 3.19 | 2.85 | 3.68    | 3.19 | 2.85 | 3.68 |
| 0.09 | 5     | 3.5   | 0.1039 | 0.0876 | 0.1211 | 4.22  | 2.34    | 7.93  | 3.70 | 3.35 | 4.13    | 3.70 | 3.35 | 4.13 |
| 0.09 | 10    | 1.5   | 0.0778 | 0.0423 | 0.1208 | 10.01 | 5.56    | 17.73 | 1.64 | 1.46 | 1.93    | 1.64 | 1.46 | 1.93 |
| 0.09 | 10    | 2     | 0.0925 | 0.0660 | 0.1196 | 9.26  | 5.85    | 13.45 | 2.16 | 1.96 | 2.49    | 2.16 | 1.96 | 2.49 |
| 0.09 | 10    | 2.5   | 0.0963 | 0.0729 | 0.1170 | 9.30  | 7.16    | 12.50 | 2.82 | 2.40 | 3.18    | 2.82 | 2.40 | 3.18 |
| 0.09 | 10    | 3     | 0.0992 | 0.0831 | 0.1189 | 9.25  | 6.11    | 12.76 | 3.22 | 2.95 | 3.61    | 3.22 | 2.95 | 3.61 |
| 0.09 | 10    | 3.5   | 0.1070 | 0.0885 | 0.1222 | 8.29  | 5.81    | 10.94 | 3.67 | 3.36 | 4.20    | 3.67 | 3.36 | 4.20 |
| 0.09 | 15    | 1.5   | 0.0822 | 0.0507 | 0.1257 | 14.59 | 9.22    | 22.62 | 1.61 | 1.43 | 1.89    | 1.61 | 1.43 | 1.89 |
| 0.09 | 15    | 2     | 0.0911 | 0.0668 | 0.1217 | 14.35 | 9.39    | 20.13 | 2.16 | 1.94 | 2.45    | 2.16 | 1.94 | 2.45 |
| 0.09 | 15    | 2.5   | 0.0978 | 0.0754 | 0.1202 | 13.77 | 10.40   | 17.99 | 2.72 | 2.40 | 3.00    | 2.72 | 2.40 | 3.00 |
| 0.09 | 15    | 3     | 0.0997 | 0.0844 | 0.1206 | 13.50 | 10.60   | 16.88 | 3.13 | 2.82 | 3.49    | 3.13 | 2.82 | 3.49 |
| 0.09 | 15    | 3.5   | 0.1036 | 0.0861 | 0.1229 | 12.95 | 9.89    | 16.86 | 3.60 | 3.20 | 4.15    | 3.60 | 3.20 | 4.15 |
| 0.09 | 20    | 1.5   | 0.0804 | 0.0495 | 0.1236 | 19.92 | 13.06   | 31.58 | 1.60 | 1.38 | 1.82    | 1.60 | 1.38 | 1.82 |
| 0.09 | 20    | 2     | 0.0920 | 0.0694 | 0.1205 | 18.18 | 12.71   | 24.69 | 2.21 | 1.95 | 2.51    | 2.21 | 1.95 | 2.51 |
| 0.09 | 20    | 2.5   | 0.0958 | 0.0742 | 0.1166 | 18.28 | 13.76   | 22.90 | 2.75 | 2.49 | 3.05    | 2.75 | 2.49 | 3.05 |
| 0.09 | 20    | 3     | 0.0974 | 0.0816 | 0.1202 | 17.55 | 13.32   | 22.38 | 3.28 | 2.95 | 3.59    | 3.28 | 2.95 | 3.59 |
| 0.09 | 20    | 3.5   | 0.1067 | 0.0925 | 0.1171 | 16.49 | 13.66   | 20.83 | 3.68 | 3.32 | 4.21    | 3.68 | 3.32 | 4.21 |
| 0.13 | 5     | 1.5   | 0.1163 | 0.0720 | 0.1671 | 4.87  | 2.51    | 8.11  | 1.65 | 1.49 | 1.83    | 1.65 | 1.49 | 1.83 |
| 0.13 | 5     | 2     | 0.1250 | 0.0991 | 0.1603 | 5.15  | 2.82    | 7.72  | 2.22 | 2.04 | 2.53    | 2.22 | 2.04 | 2.53 |
| 0.13 | 5     | 2.5   | 0.1387 | 0.1173 | 0.1654 | 4.65  | 2.51    | 7.04  | 2.77 | 2.52 | 3.08    | 2.77 | 2.52 | 3.08 |
| 0.13 | 5     | 3     | 0.1469 | 0.1220 | 0.1649 | 4.40  | 2.83    | 6.17  | 3.20 | 2.93 | 3.47    | 3.20 | 2.93 | 3.47 |
| 0.13 | 5     | 3.5   | 0.1467 | 0.1293 | 0.1747 | 4.45  | 2.46    | 6.13  | 3.69 | 3.36 | 4.25    | 3.69 | 3.36 | 4.25 |
| 0.13 | 10    | 1.5   | 0.1094 | 0.0707 | 0.1660 | 10.69 | 7.35    | 17.96 | 1.68 | 1.53 | 1.84    | 1.68 | 1.53 | 1.84 |
| 0.13 | 10    | 2     | 0.1306 | 0.1113 | 0.1529 | 9.40  | 6.89    | 13.22 | 2.17 | 2.01 | 2.36    | 2.17 | 2.01 | 2.36 |
| 0.13 | 10    | 2.5   | 0.1432 | 0.1197 | 0.1595 | 9.15  | 7.21    | 11.97 | 2.73 | 2.52 | 3.01    | 2.73 | 2.52 | 3.01 |
| 0.13 | 10    | 3     | 0.1457 | 0.1308 | 0.1682 | 8.89  | 6.64    | 11.08 | 3.23 | 3.00 | 3.54    | 3.23 | 3.00 | 3.54 |
| 0.13 | 10    | 3.5   | 0.1497 | 0.1320 | 0.1728 | 8.54  | 6.62    | 10.61 | 3.60 | 3.26 | 3.97    | 3.60 | 3.26 | 3.97 |
| 0.13 | 15    | 1.5   | 0.1180 | 0.0778 | 0.1677 | 15.08 | 10.41   | 22.63 | 1.60 | 1.46 | 1.80    | 1.60 | 1.46 | 1.80 |
| 0.13 | 15    | 2     | 0.1277 | 0.1044 | 0.1593 | 14.45 | 11.56   | 18.45 | 2.15 | 1.96 | 2.40    | 2.15 | 1.96 | 2.40 |
| 0.13 | 15    | 2.5   | 0.1380 | 0.1124 | 0.1625 | 14.34 | 11.23   | 17.93 | 2.72 | 2.45 | 3.04    | 2.72 | 2.45 | 3.04 |
| 0.13 | 15    | 3     | 0.1432 | 0.1254 | 0.1667 | 13.41 | 11.03   | 16.81 | 3.13 | 2.87 | 3.63    | 3.13 | 2.87 | 3.63 |
| 0.13 | 15    | 3.5   | 0.1488 | 0.1281 | 0.1674 | 13.00 | 10.35   | 16.30 | 3.56 | 3.20 | 3.98    | 3.56 | 3.20 | 3.98 |
| 0.13 | 20    | 1.5   | 0.1203 | 0.0862 | 0.1765 | 19.72 | 13.93   | 26.77 | 1.61 | 1.48 | 1.83    | 1.61 | 1.48 | 1.83 |
| 0.13 | 20    | 2     | 0.1325 | 0.1093 | 0.1546 | 18.54 | 15.11   | 23.43 | 2.21 | 1.99 | 2.39    | 2.21 | 1.99 | 2.39 |
| 0.13 | 20    | 2.5   | 0.1351 | 0.1130 | 0.1601 | 18.38 | 14.63   | 22.97 | 2.79 | 2.50 | 3.00    | 2.79 | 2.50 | 3.00 |
| 0.13 | 20    | 3     | 0.1434 | 0.1256 | 0.1645 | 18.43 | 14.94   | 22.27 | 3.24 | 2.94 | 3.60    | 3.24 | 2.94 | 3.60 |
| 0.13 | 20    | 3.5   | 0.1488 | 0.1320 | 0.1637 | 16.81 | 13.99   | 20.18 | 3.64 | 3.34 | 4.11    | 3.64 | 3.34 | 4.11 |

Table S5: Estimated values for the cases in Table S4, for each unique set of parameter values. The first three columns are simulated values. The following columns show estimated  $\pi$ , *de novo* mean relative risk (dn RR) and case-control (cc) RR; for each parameter, shown are median (Q50) and 5th and 95th %-iles (Q5 and Q95) estimates over 100 simulation replicates.

| $\bar{\beta}_{DN}$ | $\bar{\beta}_{CC}$ | $e.\pi$   | $e.\bar{\beta}_{DN}$ | $e.\bar{\beta}_{CC}$ | $e.\beta_{DN}$ | $e.\beta_{CC}$ | FDR0.01 | FDR0.05 | FDR0.1 | FDR0.25 | FDR0.5 |
|--------------------|--------------------|-----------|----------------------|----------------------|----------------|----------------|---------|---------|--------|---------|--------|
| 0.01               | 0.11               | 0.0008985 | 12.16                | 2.37                 | 0.82           | 1.38           | 0       | 0       | 0      | 0       | 0      |
| 0.01               | 0.14               | 0.0013925 | 7.76                 | 2.02                 | 0.84           | 2.08           | 0       | 0       | 0      | 0       | 0      |
| 0.01               | 0.2                | 0.0011444 | 7.38                 | 1.66                 | 0.86           | 3.2            | 0       | 0       | 0      | 0       | 0      |
| 0.01               | 0.33               | 0.0014319 | 10.32                | 1.46                 | 0.83           | 5.06           | 0       | 0       | 0      | 0       | 0      |
| 0.01               | 1                  | 0.0010192 | 6.12                 | 1.26                 | 0.87           | 24.04          | 0       | 0       | 0      | 0       | 0      |
| 0.02               | 0.11               | 0.0012389 | 5.7                  | 1.72                 | 0.88           | 2.07           | 0       | 0       | 0      | 0       | 0      |
| 0.02               | 0.14               | 0.00339   | 6.25                 | 1.6                  | 0.88           | 5.1            | 0       | 0       | 0      | 0       | 0      |
| 0.02               | 0.2                | 0.0036757 | 12.62                | 1.53                 | 0.83           | 4.77           | 0       | 0       | 0      | 0       | 0      |
| 0.02               | 0.33               | 0.0040126 | 3.34                 | 1.32                 | 1.14           | 15.47          | 0       | 0       | 0      | 0       | 0      |
| 0.02               | 1                  | 0.0057346 | 5.27                 | 1.15                 | 0.92           | 51.7           | 0       | 0       | 0      | 0       | 0      |
| 0.03               | 0.11               | 0.0012311 | 7.23                 | 1.63                 | 0.87           | 2.43           | 0       | 0       | 0      | 0       | 0      |
| 0.03               | 0.14               | 0.0009967 | 6.37                 | 1.61                 | 0.87           | 3.88           | 0       | 0       | 0      | 0       | 0      |
| 0.03               | 0.2                | 0.0022818 | 5.16                 | 1.55                 | 0.92           | 5.4            | 0       | 0       | 0      | 0       | 0      |
| 0.03               | 0.33               | 0.0110319 | 4.16                 | 1.35                 | 1.02           | 16.06          | 0       | 0       | 0      | 0       | 2      |
| 0.03               | 1                  | 0.004111  | 3.75                 | 1.19                 | 1.03           | 42.34          | 0       | 0       | 0      | 0       | 0      |
| 0.05               | 0.11               | 0.0018204 | 5.78                 | 1.38                 | 0.9            | 5.92           | 0       | 0       | 0      | 0       | 0      |
| 0.05               | 0.14               | 0.0015779 | 7.84                 | 2.04                 | 0.86           | 2.14           | 0       | 0       | 0      | 0       | 0      |
| 0.05               | 0.2                | 0.0034645 | 4.75                 | 1.34                 | 0.94           | 9.15           | 0       | 0       | 0      | 0       | 0      |
| 0.05               | 0.33               | 0.0123621 | 1.75                 | 1.24                 | 2.27           | 24.09          | 0       | 0       | 0      | 0       | 0      |
| 0.05               | 1                  | 0.0035687 | 3.63                 | 1.18                 | 1.03           | 47.33          | 0       | 0       | 0      | 0       | 0      |

Table S6: Estimated values in the case  $\pi = 0$  and  $\bar{\gamma} = 1$ . The first two columns are  $\bar{\beta}$  values (prior information of  $\bar{\gamma}$ :  $\bar{\gamma} \sim \text{Gamma}(1, \bar{\beta})$ ). The third to the seventh columns are genetic parameters estimated from **extTADA**. Next columns are the number of risk genes estimated with the corresponding FDR values in the header.

| Disease | Mutation   | Count | Sample size | Mutation count per sample size |
|---------|------------|-------|-------------|--------------------------------|
| SCZ     | silentFCPk | 50    | 1077        | 0.05                           |
|         | MiD        | 105   | 1077        | 0.1                            |
|         | LoF        | 116   | 1077        | 0.11                           |
| ASD     | MiD        | 618   | 5122        | 0.12                           |
|         | LoF        | 638   | 5122        | 0.12                           |
| ID      | MiD        | 223   | 1022        | 0.22                           |
|         | LoF        | 225   | 1022        | 0.23                           |
| EPI     | MiD        | 69    | 356         | 0.19                           |
|         | LoF        | 52    | 356         | 0.15                           |
| DD      | MiD        | 1041  | 4293        | 0.24                           |
|         | LoF        | 1066  | 4293        | 0.25                           |

Table S7: *de novo* mutation counts of categories and their mutation counts per sample size for schizophrenia (SCZ), autism spectrum disorder (ASD), epilepsy (EPI), intellectual disorder (ID) and developmental disorder (DD).

| Parameters                      | Estimated mode | lCI    | uCI     |
|---------------------------------|----------------|--------|---------|
| SCZ_pi_silentFCPkdn             | 0.0056         | 0      | 0.1977  |
| SCZ_hyperGammaMean_silentFCPkdn | 1.5802         | 1.001  | 21.5139 |
| SCZ_pi_MiDdn                    | 0.012          | 0      | 0.2368  |
| SCZ_hyperGammaMean_MiDdn        | 1.7486         | 1      | 17.8548 |
| SCZ_pi_LoFdn                    | 0.0548         | 0.0124 | 0.2062  |
| SCZ_hyperGammaMean_LoFdn        | 11.1857        | 3.3973 | 31.3602 |
| SCZ_pi_MiD+LoFcc                | 0.069          | 0.0296 | 0.1359  |
| SCZ_hyperGammaMean_MiD+LoFcc    | 2.0176         | 1.2133 | 5.3694  |
| SCZ_hyperGammaMean_MiD+LoFcc    | 3.2288         | 1.2372 | 17.1478 |
| SCZ_hyperGammaMean_MiD+LoFcc    | 1.0691         | 1.0002 | 2.9574  |

Table S8: Genetic parameters for SCZ data if single class is used in the analysis.

Table S9: extTADA results of SCZ risk gene identification (See LongSupTables.xlsx Download).

Table S10: extTADA risk gene identification results of ID data (See LongSupTables.xlsx Download).

Table S11: extTADA risk gene identification results of DD data (See LongSupTables.xlsx Download).

Table S12: extTADA risk gene identification results of ASD data (See LongSupTables.xlsx Download).

Table S13: extTADA risk gene identification results of EPI data (See LongSupTables.xlsx Download).

| Parameters                  | Estimated mode | lCI    | uCI     |
|-----------------------------|----------------|--------|---------|
| SCZ_pi0                     | 9.37           | 5.47   | 15.12   |
| SCZ_meanRR_silentFCPkdenovo | 1.3068         | 1.0005 | 2.7489  |
| SCZ_meanRR_MiDdenovo        | 2.2246         | 1.0006 | 5.3491  |
| SCZ_meanRR_LoFdenovo        | 15.1491        | 5.8606 | 27.3941 |
| SCZ_meanRR_MiD+LoFccPop1    | 1.8677         | 1.0374 | 3.0736  |
| SCZ_meanRR_MiD+LoFccPop2    | 2.2632         | 1.003  | 4.9168  |
| SCZ_meanRR_MiD+LoFccPop3    | 1.0372         | 1.0002 | 1.1807  |
| ASD_pi                      | 9.47           | 7.61   | 12.27   |
| ASD_meanRR_MiDdenovo        | 5.09           | 2.47   | 10.51   |
| ASD_meanRR_LoFdenovo        | 20.23          | 12.21  | 32.31   |
| ASD_meanRR_LoFcc            | 2.48           | 1.48   | 5.95    |
| ID_pi                       | 3.53           | 2.63   | 4.56    |
| ID_meanRR_MiDdenovo         | 35.29          | 21.46  | 51.62   |
| ID_meanRR_LoFdenovo         | 105.44         | 74.58  | 143.02  |
| DD_pi                       | 1.91           | 1.57   | 2.37    |
| DD_meanRR_MiDdenovo         | 22.72          | 13.91  | 34.36   |
| DD_meanRR_LoFdenovo         | 99.94          | 75.39  | 127.18  |
| EPI_pi                      | 1.67           | 0.96   | 3.1     |
| EPI_meanRR_MiDdenovo        | 71.77          | 37.15  | 125.14  |
| EPI_meanRR_LoFdenovo        | 94.98          | 51.73  | 176.16  |

Table S14: SCZ and NDD genetic parameters after adjusting mutation rates.

| Parameter           | Mode    | lCI    | uCI     |
|---------------------|---------|--------|---------|
| pi0                 | 0.0821  | 0.0487 | 0.1398  |
| hyperGammaMeanDN[1] | 1.2199  | 1.0001 | 2.2     |
| hyperGammaMeanDN[2] | 1.4407  | 1.0043 | 2.9893  |
| hyperGammaMeanDN[3] | 11.9591 | 4.1894 | 23.9414 |
| hyperGammaMeanCC    | 1.9498  | 1.0845 | 3.2072  |

Table S15: Estimated genetic parameters for SCZ data with the same mean RRs for case-control data.

| Parameters                  | Estimated mode | lCI    | uCI     |
|-----------------------------|----------------|--------|---------|
| SCZ_pi                      | 0.0732         | 0.0306 | 0.1506  |
| SCZ_meanRR_silentFCPkdenovo | 1.2353         | 1.0021 | 3.6086  |
| SCZ_meanRR_MiDdenovo        | 1.4459         | 1.0008 | 4.7004  |
| SCZ_meanRR_LoFdenovo        | 12.0403        | 4.6136 | 25.8786 |
| SCZ_meanRR_MiD+LoFccPop1    | 1.5856         | 1.1255 | 4.0881  |
| SCZ_meanRR_MiD+LoFccPop2    | 1.7361         | 1.0438 | 4.8856  |
| SCZ_meanRR_MiD+LoFccPop3    | 1.0698         | 1.0001 | 2.9991  |

Table S16: SCZ genetic parameters using all variants in and not in ExAC database (InExAC + NoExAC).

Table S17: extTADA results of SCZ risk gene identification after adjusting mutation rates (See LongSupTables.xlsx Download ).

| Gene set                | GN0  | GN0  | P value  | FDR      |
|-------------------------|------|------|----------|----------|
| pLI09                   | 3488 | 3241 | 1.00e-05 | 8.45e-03 |
| rbfox2                  | 3068 | 2895 | 1.33e-05 | 8.45e-03 |
| GGGAGGRR_V\$_MAZ_Q6     | 2274 | 2114 | 3.50e-05 | 1.33e-02 |
| ACAGGGT,MIR-10A,MIR-10B | 123  | 116  | 3.00e-05 | 1.33e-02 |
| chd8.human.brain        | 2798 | 2601 | 5.00e-05 | 1.58e-02 |
| rbfox13                 | 3445 | 3230 | 1.70e-04 | 4.62e-02 |
| FMRP_targets            | 839  | 792  | 2.10e-04 | 4.99e-02 |

Table S18: Enrichment of gene sets from different databases with SCZ genes from **extTADA** results. These p values were obtained by 10,000,000 simulations, and then adjusted by using the method of [Benjamini and Hochberg \(1995\)](#).

Table S19: The p values of enrichment tests for known gene sets in SCZ, DD, ID, ASD and EPI (See LongSupTables.xlsx Download).

Table S20: The p values of enrichment tests for all gene sets in SCZ, DD, ID, ASD and EPI (See LongSupTables.xlsx Download).

Table S21: Community memberships of the GeNets InWeb PPI 288 NDD genes network.

Table S22: Enrichment results of GeNets. These are enrichment results of 6 communities obtained from GeNets.

## References

- À. Bayés, L. N. van de Lagemaat, M. O. Collins, M. D. Croning, I. R. Whittle, J. S. Choudhary, and S. G. Grant. Characterization of the proteome, diseases and evolution of the human postsynaptic density. *Nature neuroscience*, 14(1): 19–21, 2011.
- Y. Benjamini and Y. Hochberg. Controlling the false discovery rate: a practical and powerful approach to multiple testing. *Journal of the royal statistical society. Series B (Methodological)*, pages 289–300, 1995.
- B. Carpenter, A. Gelman, M. Hoffman, D. Lee, B. Goodrich, M. Betancourt, M. A. Brubaker, J. Guo, P. Li, and A. Riddell. Stan: a probabilistic programming language. *Journal of Statistical Software*, 2015.
- J. Cotney, R. A. Muhle, S. J. Sanders, L. Liu, A. J. Willsey, W. Niu, W. Liu, L. Klei, J. Lei, J. Yin, et al. The autism-associated chromatin modifier chd8 regulates other autism risk genes during human neurodevelopment. *Nature communications*, 6, 2015.
- J. C. Darnell, S. J. Van Driesche, C. Zhang, K. Y. S. Hung, A. Mele, C. E. Fraser, E. F. Stone, C. Chen, J. J. Fak, S. W. Chi, et al. Fmrp stalls ribosomal translocation on mrnas linked to synaptic function and autism. *Cell*, 146(2): 247–261, 2011.
- J. De Ligt, M. H. Willemsen, B. W. van Bon, T. Kleefstra, H. G. Yntema, T. Kroes, A. T. Vulto-van Silfhout, D. A. Koolen, P. de Vries, C. Gilissen, et al. Diagnostic exome sequencing in persons with severe intellectual disability. *New England Journal of Medicine*, 367(20):1921–1929, 2012.



- S. De Rubeis, X. He, A. P. Goldberg, C. S. Poultney, K. Samocha, A. E. Cicek, Y. Kou, L. Liu, M. Fromer, S. Walker, et al. Synaptic, transcriptional and chromatin genes disrupted in autism. *Nature*, 515(7526):209–215, 2014.
- Deciphering Developmental Disorders Study. Prevalence and architecture of de novo mutations in developmental disorders. *Nature*, 542(7642):433–438, 2017.
- EuroEPINOMICS-RES Consortium, Epilepsy Phenome/Genome Project, and Epi4K Consortium. De novo mutations in synaptic transmission genes including *dnm1* cause epileptic encephalopathies. *The American Journal of Human Genetics*, 95(4):360–370, 2014.
- C. Fraley and A. E. Raftery. Mclust: Software for model-based cluster analysis. *Journal of Classification*, 16(2):297–306, 1999.
- M. Fromer, A. J. Pocklington, D. H. Kavanagh, H. J. Williams, S. Dwyer, P. Gormley, L. Georgieva, E. Rees, P. Palta, D. M. Ruderfer, et al. De novo mutations in schizophrenia implicate synaptic networks. *Nature*, 506(7487):179–184, 2014.
- G. Genovese, M. Fromer, E. A. Stahl, D. M. Ruderfer, K. Chambert, M. Landen, J. L. Moran, S. M. Purcell, P. Sklar, P. F. Sullivan, C. M. Hultman, and S. A. McCarroll. Increased burden of ultra-rare protein-altering variants among 4,877 individuals with schizophrenia. *Nat Neurosci*, advance online publication:–, 10 2016. URL <http://dx.doi.org/10.1038/nm.4402>.
- S. L. Girard, J. Gauthier, A. Noreau, L. Xiong, S. Zhou, L. Jouan, A. Dionne-Laporte, D. Spiegelman, E. Henrion, O. Diallo, et al. Increased exonic de novo mutation rate in individuals with schizophrenia. *Nature genetics*, 43(9):860–863, 2011.
- M. Guipponi, F. A. Santoni, V. Setola, C. Gehrig, M. Rotharmel, M. Cuenca, O. Guillin, D. Dikeos, G. Georgantopoulos, G. Papadimitriou, et al. Exome sequencing in 53 sporadic cases of schizophrenia identifies 18 putative candidate genes. *PloS one*, 9(11):e112745, 2014.
- S. Gulsuner, T. Walsh, A. C. Watts, M. K. Lee, A. M. Thornton, S. Casadei, C. Rippey, H. Shahin, V. L. Nimgaonkar, R. C. Go, et al. Spatial and temporal mapping of de novo mutations in schizophrenia to a fetal prefrontal cortical network. *Cell*, 154(3):518–529, 2013.
- F. F. Hamdan, M. Srour, J.-M. Capo-Chichi, H. Daoud, C. Nassif, L. Patry, C. Massicotte, A. Ambalavanan, D. Spiegelman, O. Diallo, et al. De novo mutations in moderate or severe intellectual disability. *PLoS Genet*, 10(10):e1004772, 2014.
- X. He, S. J. Sanders, L. Liu, S. De Rubeis, E. T. Lim, J. S. Sutcliffe, G. D. Schellenberg, R. A. Gibbs, M. J. Daly, J. D. Buxbaum, et al. Integrated model of de novo and inherited genetic variants yields greater power to identify risk genes. *PLoS Genet*, 9(8):e1003671, 2013.

- I. Iossifov, M. Ronemus, D. Levy, Z. Wang, I. Hakker, J. Rosenbaum, B. Yamrom, Y.-h. Lee, G. Narzisi, A. Leotta, et al. De novo gene disruptions in children on the autistic spectrum. *Neuron*, 74(2):285–299, 2012.
- X. Ji, R. L. Kember, C. D. Brown, and M. Buan. Increased burden of deleterious variants in essential genes in autism spectrum disorder. *Proceedings of the National Academy of Sciences*, 2016. doi: 10.1073/pnas.1613195113.
- M. R. Johnson, K. Shkura, S. R. Langley, A. Delahaye-Duriez, P. Srivastava, W. D. Hill, O. J. Rackham, G. Davies, S. E. Harris, A. Moreno-Moral, et al. Systems genetics identifies a convergent gene network for cognition and neurodevelopmental disease. *Nature neuroscience*, 19(2):223–232, 2016.
- G. Kirov, A. Pocklington, P. Holmans, D. Ivanov, M. Ikeda, D. Ruderfer, J. Moran, K. Chambert, D. Toncheva, L. Georgieva, et al. De novo cnv analysis implicates specific abnormalities of postsynaptic signalling complexes in the pathogenesis of schizophrenia. *Molecular psychiatry*, 17(2):142–153, 2012.
- M. Lek, K. Karczewski, E. Minikel, K. Samocha, E. Banks, T. Fennell, A. O’Donnell-Luria, J. Ware, A. Hill, B. Cummings, et al. Analysis of protein-coding genetic variation in 60,706 humans. *bioRxiv*, page 030338, 2015.
- S. H. Lelieveld, M. R. Reijnders, R. Pfundt, H. G. Yntema, E.-J. Kamsteeg, P. de Vries, B. B. de Vries, M. H. Willemsen, T. Kleefstra, K. Löhner, et al. Meta-analysis of 2,104 trios provides support for 10 new genes for intellectual disability. *Nature Neuroscience*, 19(9):1194–1196, 2016.
- M. Lin, A. Hrabovsky, E. Pedrosa, T. Wang, D. Zheng, and H. M. Lachman. Allele-biased expression in differentiating human neurons: implications for neuropsychiatric disorders. *PLoS One*, 7(8):e44017, 2012.
- K. Lindblad-Toh, M. Garber, O. Zuk, M. F. Lin, B. J. Parker, S. Washietl, P. Kheradpour, J. Ernst, G. Jordan, E. Mauceli, et al. A high-resolution map of human evolutionary constraint using 29 mammals. *Nature*, 478(7370):476–482, 2011.
- C. Loader. Locfit: Local regression, likelihood and density estimation. *R package version*, 1, 2007.
- S. E. McCarthy, J. Gillis, M. Kramer, J. Lihm, S. Yoon, Y. Berstein, M. Mistry, P. Pavlidis, R. Solomon, E. Ghiban, et al. De novo mutations in schizophrenia implicate chromatin remodeling and support a genetic overlap with autism and intellectual disability. *Molecular psychiatry*, 19(6):652, 2014.
- B. J. O’Roak, L. Vives, S. Girirajan, E. Karakoc, N. Krumm, B. P. Coe, R. Levy, A. Ko, C. Lee, J. D. Smith, et al. Sporadic autism exomes reveal a highly interconnected protein network of de novo mutations. *Nature*, 485(7397):246–250, 2012.

- M. Pirooznia, T. Wang, D. Avramopoulos, D. Valle, G. Thomas, R. L. Huganir, F. S. Goes, J. B. Potash, and P. P. Zandi. Synaptomedb: an ontology-based knowledgebase for synaptic genes. *Bioinformatics*, 28(6):897–899, 2012.
- R Core Team. *R: A Language and Environment for Statistical Computing*. R Foundation for Statistical Computing, Vienna, Austria, 2016. URL <https://www.R-project.org/>.
- A. Rauch, D. Wieczorek, E. Graf, T. Wieland, S. Endeley, T. Schwarzmayr, B. Albrecht, D. Bartholdi, J. Beygo, N. Di Donato, et al. Range of genetic mutations associated with severe non-syndromic sporadic intellectual disability: an exome sequencing study. *The Lancet*, 380(9854):1674–1682, 2012.
- E. B. Robinson, B. M. Neale, and S. E. Hyman. Genetic research in autism spectrum disorders. *Current opinion in pediatrics*, 27(6):685, 2015.
- K. E. Samocha, E. B. Robinson, S. J. Sanders, C. Stevens, A. Sabo, L. M. McGrath, J. A. Kosmicki, K. Rehnström, S. Mallick, A. Kirby, et al. A framework for the interpretation of de novo mutation in human disease. *Nature genetics*, 46(9):944–950, 2014.
- S. J. Sanders, M. T. Murtha, A. R. Gupta, J. D. Murdoch, M. J. Raubeson, A. J. Willsey, A. G. Ercan-Sencicek, N. M. DiLullo, N. N. Parikshak, J. L. Stein, et al. De novo mutations revealed by whole-exome sequencing are strongly associated with autism. *Nature*, 485(7397):237–241, 2012.
- T. Singh, M. I. Kurki, D. Curtis, S. M. Purcell, L. Crooks, J. McRae, J. Suvisaari, H. Chheda, D. Blackwood, G. Breen, et al. Rare loss-of-function variants in *setd1a* are associated with schizophrenia and developmental disorders. *Nature neuroscience*, 2016.
- C. Spearman. The proof and measurement of association between two things. *The American journal of psychology*, 15(1):72–101, 1904.
- T. N. Turner, Q. Yi, N. Krumm, J. Huddleston, K. Hoekzema, H. A. Stessman, A.-L. Doebley, R. A. Bernier, D. A. Nickerson, and E. E. Eichler. denovodb: a compendium of human de novo variants. *Nucleic Acids Research*, page gkw865, 2016.
- J. L. Wagnon, M. Briesse, W. Sun, C. L. Mahaffey, T. Curk, G. Rot, J. Ule, and W. N. Frankel. Celf4 regulates translation and local abundance of a vast set of mrnas, including genes associated with regulation of synaptic function. *PLoS Genet*, 8(11):e1003067, 2012.
- S. M. Weyn-Vanhentenryck, A. Mele, Q. Yan, S. Sun, N. Farny, Z. Zhang, C. Xue, M. Herre, P. A. Silver, M. Q. Zhang, et al. Hits-clip and integrative modeling define the rbfox splicing-regulatory network linked to brain development and autism. *Cell reports*, 6(6):1139–1152, 2014.

B. Xu, I. Ionita-Laza, J. L. Roos, B. Boone, S. Woodrick, Y. Sun, S. Levy, J. A. Gogos, and M. Karayiorgou. De novo gene mutations highlight patterns of genetic and neural complexity in schizophrenia. *Nature genetics*, 44(12): 1365–1369, 2012.
